# Supplementary material for: 5,6,7,4’-Tetramethoxyflavanone protects against neuronal degeneration induced by dexamethasone by attenuating amyloidogenesis in mice
Source: PubMed Central journal article supplement (PMC7003641; doi:10.17179/excli2019-1940), 2020-01-02
Supplement: EXCLI-19-16-s-001.pdf [file EXCLI-19-16-s-001.pdf]

**Supplementary data to:**

**5,6,7,4'-TETRAMETHOXYFLAVANONE PROTECTS AGAINST  
NEURONAL DEGENERATION INDUCED BY DEXAMETHASONE  
BY ATTENUATING AMYLOIDOGENESIS IN MICE**

Kanet Pakdeepak<sup>1,2</sup>, Ratchanaporn Chokchaisiri<sup>3</sup>, Jiraporn Tocharus<sup>1,\*</sup>, Pranglada Jearjaroen<sup>2</sup>, Chainarong Tocharus<sup>4</sup>, Apichart Suksamrarn<sup>5</sup>

<sup>1</sup> Department of Physiology, Faculty of Medicine, Chiang Mai University, Chiang Mai 50200, Thailand

<sup>2</sup> Graduate School, Chiang Mai University, Chiang Mai 50200, Thailand

<sup>3</sup> Department of Chemistry, School of Science, University of Phayao, Phayao, Thailand

<sup>4</sup> Department of Anatomy, Faculty of Medicine, Chiang Mai University, Chiang Mai 50200, Thailand

<sup>5</sup> Department of Chemistry and Center of Excellence for Innovation in Chemistry, Faculty of Science, Ramkhamhaeng University, Bangkok 10240, Thailand

\* **Corresponding author:** Jiraporn Tocharus, Ph D., Department of Physiology, Faculty of Medicine, Chiang Mai University, Chiang Mai 50200, Thailand, Tel.: 66 53945362, E-mail: [jtocharus@gmail.com](mailto:jtocharus@gmail.com)

<http://dx.doi.org/10.17179/excli2019-1940>

This is an Open Access article distributed under the terms of the Creative Commons Attribution License (<http://creativecommons.org/licenses/by/4.0/>).

**Supplementary Table 1:** Raw data for anxiety investigation by OFT (video was tracked by SMART software; Panlab Harward Apparatus) which relate to Figure 2B–2E

| OFT                   |      | Time (sec) |      |      |      |      |      | Average | SD   | SEM |
|-----------------------|------|------------|------|------|------|------|------|---------|------|-----|
| Time in central       | n1   | n2         | n3   | n4   | n5   | n6   |      |         |      |     |
| Control               | 3.13 | 3.14       | 3.81 | 3.05 | 3.87 | 3.11 | 3.36 | 0.39    | 0.16 |     |
| TMF                   | 1.51 | 3.49       | 2.6  | 6.21 | 1.56 | 1.56 | 2.53 | 0.99    | 0.40 |     |
| Pioglitazone          | 1.91 | 2.03       | 2.31 | 2.66 | 2.23 | 5.89 | 2.08 | 0.21    | 0.08 |     |
| DEX                   | 0.06 | 0.41       | 0.2  | 0.2  | 0.57 | 0.03 | 0.22 | 0.18    | 0.07 |     |
| DEX plus TMF          | 3.76 | 1.98       | 2.11 | 2.48 | 1.23 | 4.62 | 2.62 | 0.99    | 0.41 |     |
| DEX plus pioglitazone | 1.99 | 3.62       | 2.23 | 2.03 | 2.05 | 4.71 | 2.61 | 0.88    | 0.36 |     |

| OFT                   |        | Time (sec) |        |        |        |        |        | Average | SD   | SEM |
|-----------------------|--------|------------|--------|--------|--------|--------|--------|---------|------|-----|
| Time in peripheral    | n1     | n2         | n3     | n4     | n5     | n6     |        |         |      |     |
| Control               | 296.87 | 295.86     | 296.19 | 296.71 | 295.12 | 296.98 | 296.31 | 0.52    | 0.21 |     |
| TMF                   | 293.49 | 298.51     | 297.4  | 297.59 | 293.61 | 291.83 | 296.47 | 2.64    | 1.08 |     |
| Pioglitazone          | 295.09 | 297.07     | 296.19 | 293.92 | 298.12 | 296.47 | 296.12 | 0.99    | 0.40 |     |
| DEX                   | 299.94 | 298.59     | 299.7  | 299.11 | 298.23 | 299.12 | 299.41 | 0.72    | 0.29 |     |
| DEX plus TMF          | 296.24 | 295.22     | 296.89 | 294.92 | 295.12 | 297.98 | 296.12 | 0.84    | 0.34 |     |
| DEX plus pioglitazone | 295.01 | 296.38     | 297.07 | 296.46 | 295.12 | 298.02 | 296.15 | 1.05    | 0.43 |     |

| OFT                   |      | Times |    |      |      |      |       | Average | SD   | SEM |
|-----------------------|------|-------|----|------|------|------|-------|---------|------|-----|
| Number of rearing     | n1   | n2    | n3 | n4   | n5   | n6   |       |         |      |     |
| Control               | 27.5 | 24    | 28 | 25.5 | 19.5 | 28   | 26.50 | 2.18    | 0.89 |     |
| TMF                   | 18   | 25    | 20 | 16   | 27.5 | 19.5 | 21.00 | 3.61    | 1.47 |     |
| Pioglitazone          | 27   | 24    | 31 | 22   | 33   | 27   | 27.33 | 3.51    | 1.43 |     |
| DEX                   | 14   | 14.5  | 11 | 16   | 12.5 | 17   | 13.17 | 1.89    | 0.77 |     |
| DEX plus TMF          | 24   | 18    | 20 | 30   | 19   | 21   | 20.67 | 3.06    | 1.25 |     |
| DEX plus pioglitazone | 30   | 19.5  | 21 | 22   | 22.5 | 21.5 | 23.50 | 5.68    | 2.32 |     |

| OFT                   |      | Times |     |      |     |      |       | Average | SD   | SEM |
|-----------------------|------|-------|-----|------|-----|------|-------|---------|------|-----|
| Number of grooming    | n1   | n2    | n3  | n4   | n5  | n6   |       |         |      |     |
| Control               | 10   | 8     | 12  | 14   | 4   | 8    | 10.00 | 2.00    | 0.82 |     |
| TMF                   | 8    | 7.5   | 11  | 11   | 5   | 6.5  | 8.83  | 1.89    | 0.77 |     |
| Pioglitazone          | 10.5 | 9.5   | 7.5 | 7    | 8   | 11.5 | 9.17  | 1.53    | 0.62 |     |
| DEX                   | 1    | 2     | 1.5 | 1    | 2.5 | 1    | 1.50  | 0.50    | 0.20 |     |
| DEX plus TMF          | 5    | 8.5   | 6   | 10   | 3.5 | 3    | 6.50  | 1.80    | 0.74 |     |
| DEX plus pioglitazone | 6.5  | 9.5   | 7   | 11.5 | 5.5 | 6    | 7.67  | 1.61    | 0.66 |     |

**Supplementary Table 2:** Raw data for learning and memory test by MWM (video was tracked by SMART software; Panlab Harward Apparatus) which relate to Figure 3D–3F

| MWM                   |       | Time (sec) |       |       |       |       |       | Average | SD   | SEM |
|-----------------------|-------|------------|-------|-------|-------|-------|-------|---------|------|-----|
| Escape latency time   | n1    | n2         | n3    | n4    | n5    | n6    |       |         |      |     |
| Control               | 4.89  | 4.69       | 4.14  | 5.18  | 5.94  | 5.53  | 4.57  | 0.39    | 0.16 |     |
| TMF                   | 5.32  | 7.2        | 5.79  | 5.24  | 4.38  | 6.01  | 6.10  | 0.98    | 0.40 |     |
| Pioglitazone          | 3.76  | 5.41       | 7.01  | 5.79  | 8.79  | 6.32  | 5.39  | 1.63    | 0.66 |     |
| DEX                   | 13.38 | 14.65      | 18.17 | 14.43 | 14.56 | 14.03 | 15.40 | 2.48    | 1.01 |     |
| DEX plus TMF          | 12.25 | 10.65      | 10.64 | 11.84 | 11.75 | 13.21 | 11.18 | 0.93    | 0.38 |     |
| DEX plus pioglitazone | 7.48  | 9.87       | 8.92  | 7.22  | 9.16  | 11.35 | 8.76  | 1.20    | 0.49 |     |

| MWM                     |       | Time (sec) |       |       |       |       |       | Average | SD   | SEM |
|-------------------------|-------|------------|-------|-------|-------|-------|-------|---------|------|-----|
| Time in target quadrant | n1    | n2         | n3    | n4    | n5    | n6    |       |         |      |     |
| Control                 | 23.5  | 18.2       | 22.99 | 24.62 | 19.08 | 24.09 | 22.4  | 2.92    | 1.19 |     |
| TMF                     | 29.27 | 23.31      | 14.91 | 24.46 | 19.59 | 24.89 | 24.12 | 7.21    | 2.95 |     |
| Pioglitazone            | 21.53 | 20.48      | 21.93 | 17.85 | 16.95 | 25.47 | 21.54 | 0.75    | 0.31 |     |
| DEX                     | 10.66 | 13.75      | 14.82 | 10.66 | 13.75 | 14.82 | 16.65 | 2.16    | 0.88 |     |
| DEX plus TMF            | 17.95 | 19.42      | 19.52 | 20.57 | 20.96 | 23.26 | 18.21 | 0.88    | 0.36 |     |
| DEX plus pioglitazone   | 20.49 | 21.01      | 17.49 | 22.1  | 20.73 | 19.41 | 19.31 | 1.90    | 0.78 |     |

| MWM                   |       | cm/sec |       |       |       |       |       | Average | SD   | SEM |
|-----------------------|-------|--------|-------|-------|-------|-------|-------|---------|------|-----|
| Swimming speed        | n1    | n2     | n3    | n4    | n5    | n6    |       |         |      |     |
| Control               | 33.57 | 41.25  | 53.45 | 35.62 | 34.22 | 31.01 | 42.76 | 10.03   | 4.09 |     |
| TMF                   | 39.27 | 23.31  | 34.91 | 54.46 | 49.27 | 24.89 | 32.50 | 8.25    | 3.37 |     |
| Pioglitazone          | 34.56 | 29.55  | 34.21 | 45.01 | 36.66 | 55.21 | 32.77 | 2.80    | 1.14 |     |
| DEX                   | 38.41 | 23.19  | 34.98 | 47.1  | 38.78 | 24.98 | 32.19 | 7.98    | 3.26 |     |
| DEX plus TMF          | 51.13 | 31.17  | 29.52 | 31.59 | 25.31 | 33.26 | 37.27 | 12.03   | 4.91 |     |
| DEX plus pioglitazone | 31.12 | 41.61  | 27.81 | 36.91 | 32.31 | 41.78 | 33.51 | 7.20    | 2.94 |     |

**Supplementary Table 3:** Raw data to investigate amyloidogenesis genes expression by qRT-PCR which relate to Figure 4A–4D

| qRT-PCR               |           | Fold change |           |           |           |           |      | Av-er-age | SD   | SEM |
|-----------------------|-----------|-------------|-----------|-----------|-----------|-----------|------|-----------|------|-----|
| ADAM10                | n1        | n2          | n3        | n4        | n5        | n6        |      |           |      |     |
| Control               | 1         | 1           | 1         | 1         | 1         | 1         | 1.00 | 0.00      | 0.00 |     |
| TMF                   | 0.833409  | 1.062206    | 1.184229  | 0.833409  | 1.062206  | 1.184229  | 1.03 | 0.18      | 0.07 |     |
| Pioglitazone          | 1.773053  | 0.8704219   | 0.8440408 | 1.773053  | 0.8704219 | 0.8440408 | 1.16 | 0.53      | 0.22 |     |
| DEX                   | 0.2477358 | 0.1157734   | 0.2160244 | 0.4477358 | 0.3157734 | 0.4160244 | 0.19 | 0.07      | 0.03 |     |
| DEX plus TMF          | 0.8410285 | 0.7429374   | 1.264839  | 0.7410285 | 0.8429374 | 1.464839  | 0.95 | 0.28      | 0.11 |     |
| DEX plus pioglitazone | 1.911946  | 1.329108    | 1.694478  | 1.911946  | 1.329108  | 1.694478  | 1.65 | 0.29      | 0.12 |     |

| qRT-PCR               |           | Fold change |           |           |           |           |      | Av-er-age | SD   | SEM |
|-----------------------|-----------|-------------|-----------|-----------|-----------|-----------|------|-----------|------|-----|
| BACE1                 | n1        | n2          | n3        | n4        | n5        | n6        |      |           |      |     |
| Control               | 1         | 1           | 1         | 1         | 1         | 1         | 1.00 | 0.00      | 0.00 |     |
| TMF                   | 1.125341  | 0.2770034   | 1.197147  | 1.125341  | 0.2770034 | 1.197147  | 0.87 | 0.51      | 0.21 |     |
| Pioglitazone          | 0.6465945 | 0.1194291   | 0.6414075 | 0.6465945 | 0.1194291 | 0.6414075 | 0.47 | 0.30      | 0.12 |     |
| DEX                   | 2.197812  | 1.481598    | 1.563029  | 2.197812  | 1.481598  | 1.563029  | 1.75 | 0.39      | 0.16 |     |
| DEX plus TMF          | 1.595159  | 0.8679951   | 1.252444  | 1.295159  | 0.8679951 | 1.252444  | 1.24 | 0.36      | 0.15 |     |
| DEX plus pioglitazone | 0.7254966 | 0.8641342   | 0.9435608 | 0.7254966 | 0.8641342 | 0.9435608 | 0.84 | 0.11      | 0.05 |     |

| qRT-PCR               |           | Fold change |           |           |           |           |      | Aver-age | SD   | SEM |
|-----------------------|-----------|-------------|-----------|-----------|-----------|-----------|------|----------|------|-----|
| PS1                   | n1        | n2          | n3        | n4        | n5        | n6        |      |          |      |     |
| Control               | 1         | 1           | 1         | 1         | 1         | 1         | 1.00 | 0.00     | 0.00 |     |
| TMF                   | 0.5703976 | 1.758815    | 0.5686346 | 0.5703976 | 1.758815  | 0.5686346 | 0.97 | 0.69     | 0.28 |     |
| Pioglitazone          | 0.6068053 | 0.3626619   | 0.5214976 | 0.6068053 | 0.3626619 | 0.5214976 | 0.50 | 0.12     | 0.05 |     |
| DEX                   | 1.57512   | 1.570488    | 2.214808  | 1.57512   | 1.570488  | 2.214808  | 1.79 | 0.37     | 0.15 |     |
| DEX plus TMF          | 1.663366  | 1.655074    | 0.8003142 | 1.663366  | 1.655074  | 0.8003142 | 1.37 | 0.50     | 0.20 |     |
| DEX plus pioglitazone | 1.179073  | 0.8606647   | 0.6428713 | 1.179073  | 0.8606647 | 0.6428713 | 0.89 | 0.27     | 0.11 |     |

| qRT-PCR               |           | Fold change |           |           |           |           |      | Av-er-age | SD   | SEM |
|-----------------------|-----------|-------------|-----------|-----------|-----------|-----------|------|-----------|------|-----|
| APP                   | n1        | n2          | n3        | n4        | n5        | n6        |      |           |      |     |
| Control               | 1         | 1           | 1         | 1         | 1         | 1         | 1.00 | 0.00      | 0.00 |     |
| TMF                   | 1.145007  | 1.077904    | 0.9897956 | 1.145007  | 1.077904  | 0.9897956 | 1.07 | 0.08      | 0.03 |     |
| Pioglitazone          | 0.9769166 | 1.095183    | 0.9521693 | 0.9769166 | 1.095183  | 0.9521693 | 1.01 | 0.08      | 0.03 |     |
| DEX                   | 1.145753  | 1.44271     | 1.280274  | 1.145753  | 1.44271   | 1.280274  | 1.29 | 0.15      | 0.06 |     |
| DEX plus TMF          | 1.175246  | 1.950779    | 1.086286  | 1.175246  | 0.9507794 | 1.086286  | 1.40 | 0.48      | 0.19 |     |
| DEX plus pioglitazone | 1.276485  | 1.276485    | 0.9233383 | 1.276485  | 1.276485  | 0.9233383 | 1.16 | 0.20      | 0.08 |     |

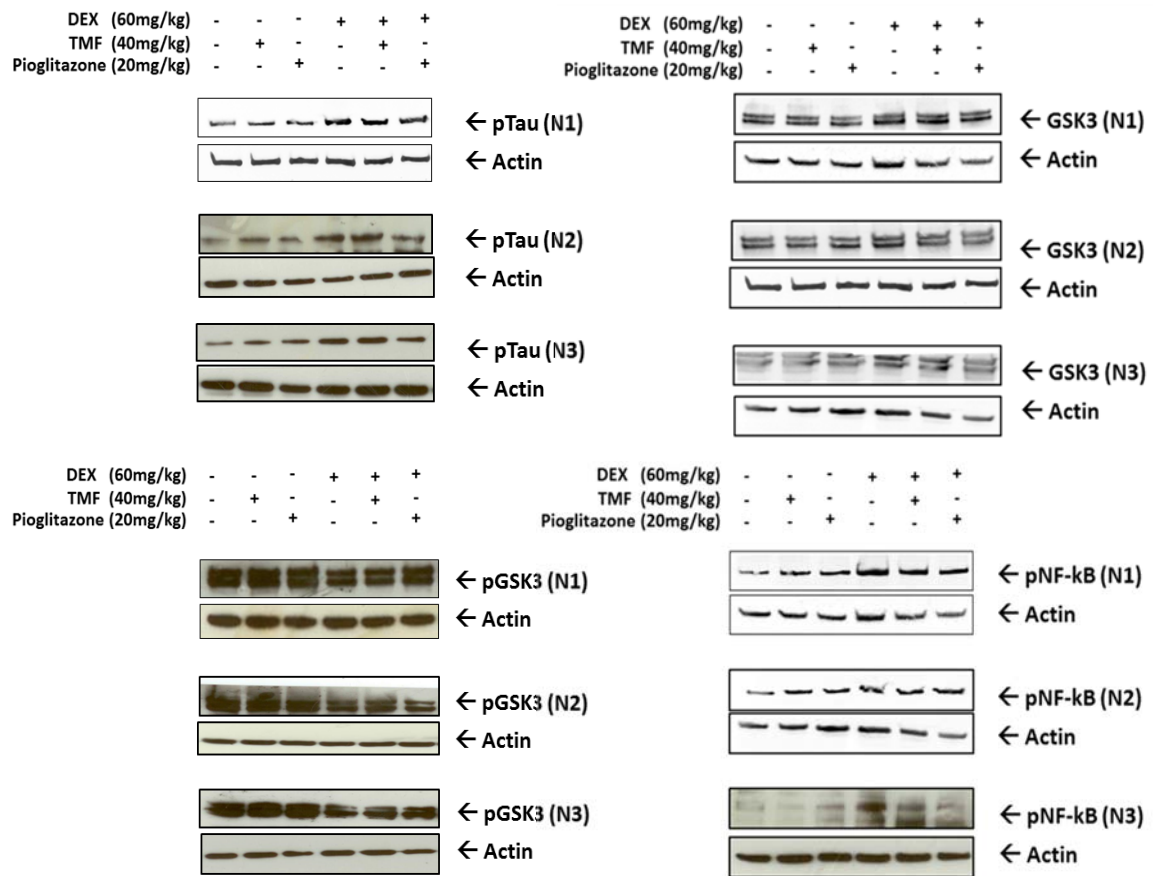

**Supplementary Figure 1:** Triplicate data for Western blotting experiments to study Tau protein expression which relate to Figure 5B–5E

**Supplementary Table 4:** Raw data for neuronal cell apoptosis study by TUNEL assay which relate to Figure 6C

| TUNEL                 | Apoptosis (% of control) |          |          |          |         |       |       |
|-----------------------|--------------------------|----------|----------|----------|---------|-------|-------|
|                       | n1                       | n2       | n3       | n4       | Average | SD    | SEM   |
| Control               | 100                      | 100      | 100      | 100      | 100.00  | 0.00  | 0.00  |
| TMF                   | 94.11765                 | 94.11765 | 70.58823 | 47.05882 | 86.27   | 13.58 | 6.79  |
| Pioglitazone          | 94.11765                 | 117.6471 | 141.1765 | 70.58823 | 117.65  | 23.53 | 11.76 |
| DEX                   | 188.2353                 | 235.2941 | 208.2353 | 211.7647 | 210.59  | 23.62 | 11.81 |
| DEX plus TMF          | 164.7059                 | 141.1765 | 211.7647 | 141.1765 | 172.55  | 35.94 | 17.97 |
| DEX plus pioglitazone | 70.58823                 | 117.6471 | 188.2353 | 164.7059 | 125.49  | 59.21 | 29.61 |

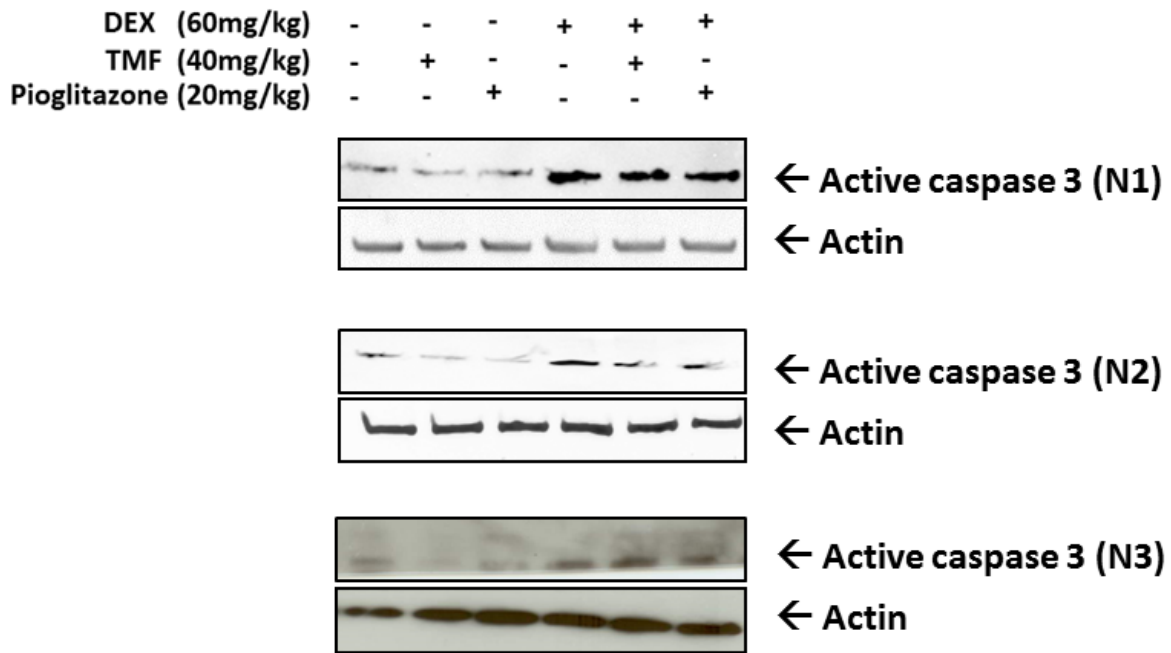

**Supplementary Figure 2:** Triplicate data for Western blotting experiments to study neuronal apoptosis which relate to Figure 6D.

**Supplementary Table 5:** Raw data to investigate AChE activity which relate to Figure 7A

| AchE activity         | mmol ACTC min <sup>-1</sup> mg protein <sup>-1</sup> |          |          |          |          |          | Av-er-age | SD   | SEM  |
|-----------------------|------------------------------------------------------|----------|----------|----------|----------|----------|-----------|------|------|
|                       | n1                                                   | n2       | n3       | n4       | n5       | n6       |           |      |      |
| Control               | 0.089964                                             | 0.088494 | 0.032928 | 0.045697 | 0.048363 | 0.079821 | 0.07      | 0.03 | 0.01 |
| TMF                   | 0.028371                                             | 0.037044 | 0.127743 | 0.088494 | 0.027048 | 0.04263  | 0.06      | 0.06 | 0.02 |
| Pioglitazone          | 0.034545                                             | 0.045423 | 0.003381 | 0.100254 | 0.070854 | 0.034251 | 0.03      | 0.02 | 0.01 |
| DEX                   | 0.155085                                             | 0.114072 | 0.125852 | 0.136837 | 0.146265 | 0.116865 | 0.13      | 0.02 | 0.01 |
| DEX plus TMF          | 0.103822                                             | 0.081438 | 0.053891 | 0.098891 | 0.072757 | 0.081879 | 0.08      | 0.03 | 0.01 |
| DEX plus pioglitazone | 0.014406                                             | 0.08613  | 0.074525 | 0.065288 | 0.085995 | 0.053059 | 0.06      | 0.04 | 0.01 |

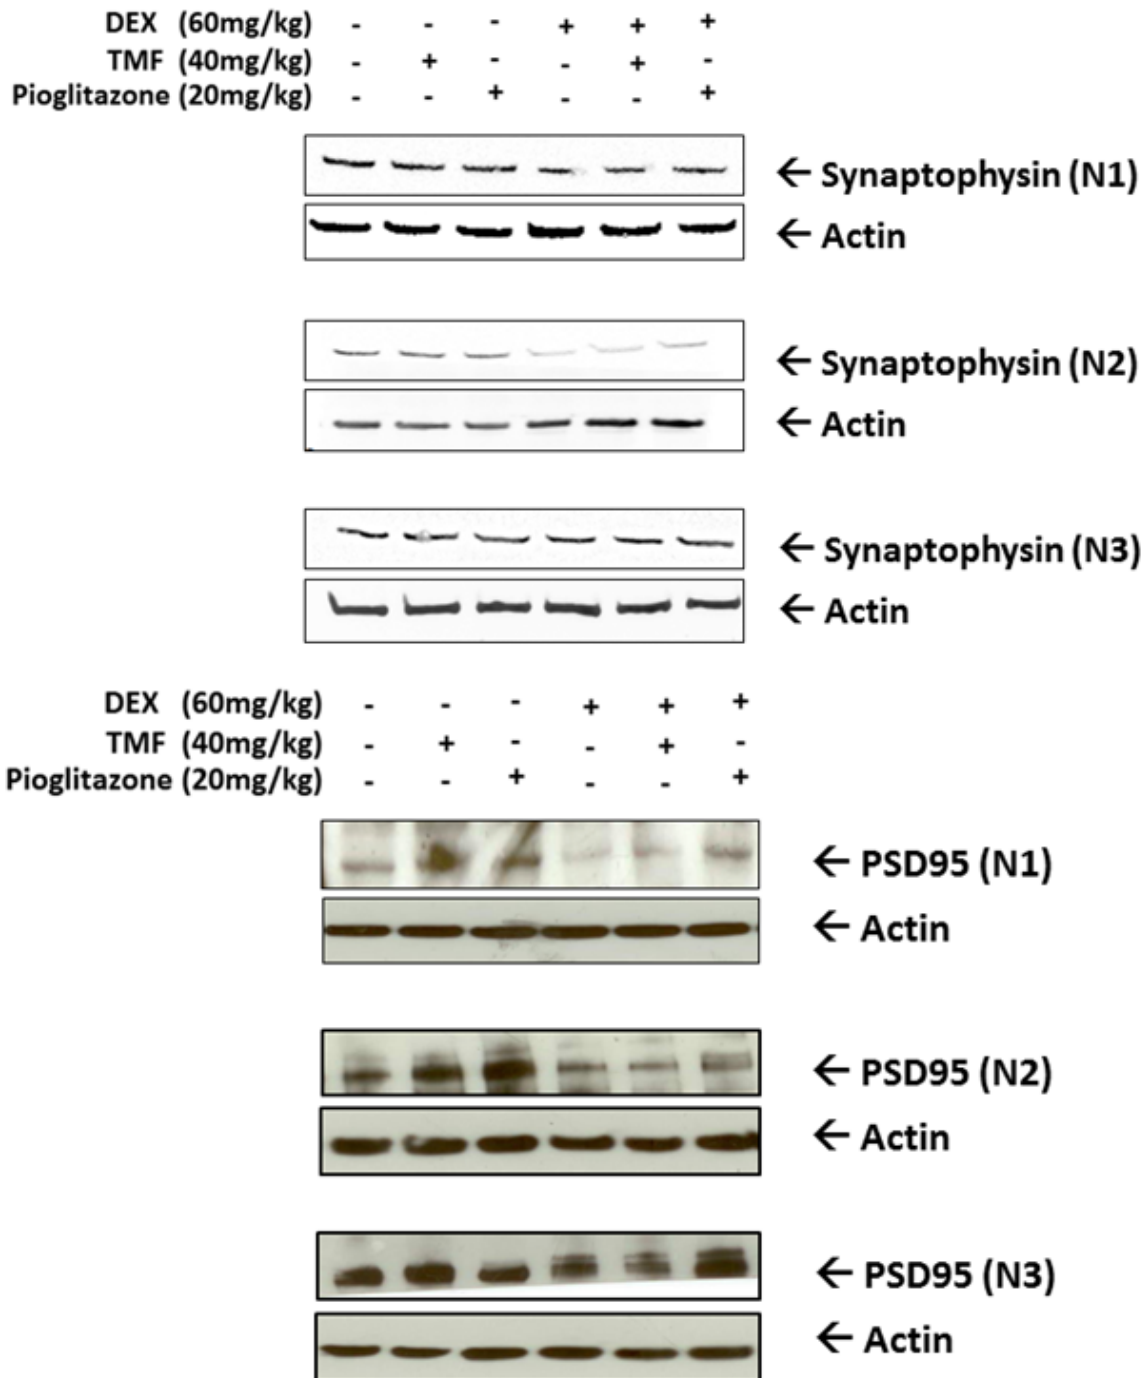

**Supplementary Figure 3:** Triplicate data for Western blotting experiments to study neuronal synaptic function which relate to Figure 6D
